# Supplementary material for: Beyond pristine MOFs: carbon dioxide capture by metal–organic frameworks (MOFs)-derived porous carbon materials
Source: Royal Society of Chemistry journal article supplement (doi:10.1039/c6ra26824b), 2017-01-01
Supplement: c6ra26824b1.pdf [file c6ra26824b1.pdf]

## Supplementary Data

# Beyond the Pristine MOFs: Carbon Dioxide Capture by Metal-Organic Frameworks (MOFs)-Derived Porous Carbon Materials

Hye Ryeon Kim,<sup>[a]</sup> Tae-Ung Yoon,<sup>[c]</sup> Seung-Ik Kim,<sup>[c]</sup> Jihyun An\*<sup>[b]</sup>, Youn-Sang Bae\*<sup>[c]</sup>,  
and Chang Yeon Lee\*<sup>[a],[d]</sup>

<sup>[a]</sup>Department of Energy and Chemical Engineering, Incheon National University, 119,  
Academy-ro, Yeonsu-gu, Incheon, 22012, Republic of Korea

<sup>[b]</sup>Department of Chemistry Education, Seoul National University, 1 Gwanak-ro, Gwanak-gu,  
Seoul, 08826, Republic of Korea.

<sup>[c]</sup>Department of Chemical and Biomolecular Engineering, Yonsei University, 50 Yonsei-ro,  
Seodaemun-gu, Seoul, 03722, Republic of Korea

<sup>[d]</sup>Innovation Center for Chemical Engineering, Incheon National University, 119, Academy-  
ro, Yeonsu-gu, Incheon, 22012, Republic of Korea

## **S1. Experimental Section**

### **Materials**

Zinc nitrate hexahydrate, zinc acetate dihydrate, terephthalic acid, 4,4'-biphenyldicarboxylic acid, adenine, methanol and chlorobenzene were purchased from Aldrich Chemical. N,N-diethylformamide (DEF) was purchased from TCI. N,N-dimethylformamide (DMF) was purchased from Fisher Scientific. 4,4',4''-benzene-1,3,5-triyl-tribenzoic acid (H<sub>3</sub>BTB) was synthesized according to the synthesis procedure reported in literature.

### **Preparations of porous carbon materials**

MOF-5, MOF-177 and bioMOF-100 samples were synthesized following the synthesis procedures reported in literatures. In order to obtain porous carbon materials, MOF-5, MOF-177 and bio-MOF-100 were placed in a quartz tube furnace and carbonized. The carbonization was performed at 1000 °C for 6 hours with a heating rate of 5 °C/min under an Ar flow. The resulting carbon materials were denoted as M5-1000, M177-1000 and B100-1000, respectively.

### **Characterizations**

Powder X-Ray diffraction (XRD) data were collected on a Rigaku smartlab diffractometer using Cu K $\alpha$  radiation ( $\lambda = 1.5412 \text{ \AA}$ ). The morphologies before and after carbonization process were characterized by using scanning electron microscopy (SEM) on a JEOL JSM-7800F microscope. Raman spectra were obtained on a WITEC alpha300 spectrometer using a helium neon laser (532 nm). X-ray photoelectron spectroscopy (XPS) measurements were performed on a PHI 5000 VersaProbe II X-ray photoelectron spectrometer. Porosity characteristics of the samples were characterized by measuring nitrogen adsorption isotherms at 77K using an adsorption analyzer (Autosorb-iQ, Quantachrome Instruments). Prior to adsorption measurements, the carbonized samples were evacuated at 150°C for 5 hours under vacuum. The specific surface areas were calculated using Brunauer–Emmett–Teller (BET) method in the linear range (M5-1000;  $0.0100 < P/P_0 < 0.0994$ , M177-1000;  $0.0100 < P/P_0 < 0.0993$ , B100-1000;  $0.0070 < P/P_0 < 0.0395$ ). CO<sub>2</sub> adsorption isotherms were obtained using an adsorption analyzer

(Autosorb-iQ, Quantachrome Instruments). Prior to adsorption measurements, the samples were activated at 150 °C for 5 hours using an outgas port of the Autosorb-iQ instrument.

### **IAST calculations**

In order to predict adsorptive behaviors of a two-component gas mixture from single-component isotherms, we used the Ideal Adsorbed Solution Theory (IAST) of Myers and Prausnitz. The IAST adsorption selectivity for CO<sub>2</sub>/N<sub>2</sub> (15% CO<sub>2</sub>, 85% N<sub>2</sub>) and CO<sub>2</sub>/CH<sub>4</sub> (50% CO<sub>2</sub>, 50% CH<sub>4</sub>) at 298 K were calculated. The adsorption selectivity for the two-component mixture is defined by  $S=(q_1/p_1)/(q_2/p_2)$ .

### **Breakthrough experiments**

The breakthrough experiments were carried out in a custom-built system illustrated in Fig. S1. Five mass flow controllers (0~100 mL/min) (Bronkhorst, Germany) were used to regulate the gas flow rates. By combining two N<sub>2</sub> streams and two CO<sub>2</sub> streams with a humidifier, dry and humid CO<sub>2</sub>/N<sub>2</sub> mixtures were generated. The column was placed in a ventilated thermostatted oven for measurements at a constant temperature. The gas composition at the outlet of the column was measured online by a mass spectrometer (Pfeiffer Vacuum Prisma QME 200, Germany).

To avoid large pressure drops, the powder sample was pelletized using a carver press (Carver, Inc., USA). The obtained pellets with a size of 500~1000 μm were initially activated at 423 K for 5 hours under vacuum. The activated pellets (153 mg) were then packed into a stainless steel column with a length of 15 cm and an internal diameter of 0.44 cm. The remainder of the column was filled with glass beads with a diameter of 750 μm. The column was then degassed by a He flow of 40 mL/min at 423 K for 1 hour to remove all the impurities adsorbed during the packing procedure. Between each measurement, a He flow of 40 mL/min at 303 K was introduced into the column for at least 10 min. At t=0, the He flow was switched to a flow of dry or humid CO<sub>2</sub>/N<sub>2</sub> mixture (CO<sub>2</sub>:N<sub>2</sub> = 15:85, total flow rate = 40 mL/min).

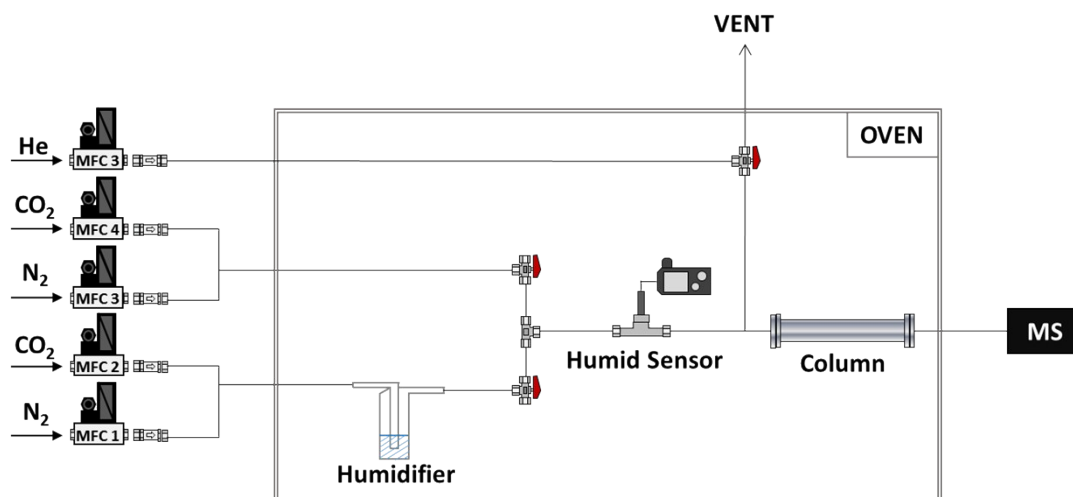

**Figure S1.** A schematic diagram of the dynamic breakthrough experimental setup. MS: Mass spectrometer, MFC: Mass flow controller, P: Pressure transducer.

## S2. Powder X-ray diffraction (PXRD) patterns

(a)

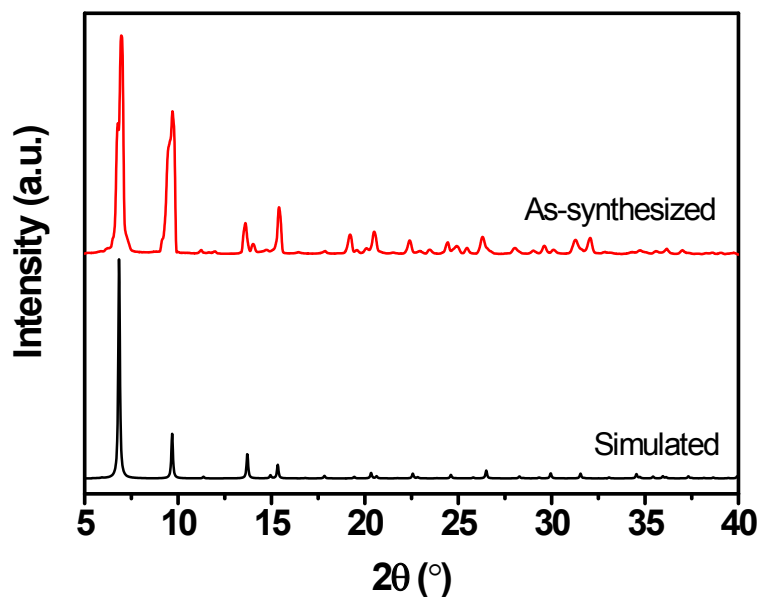

(b)

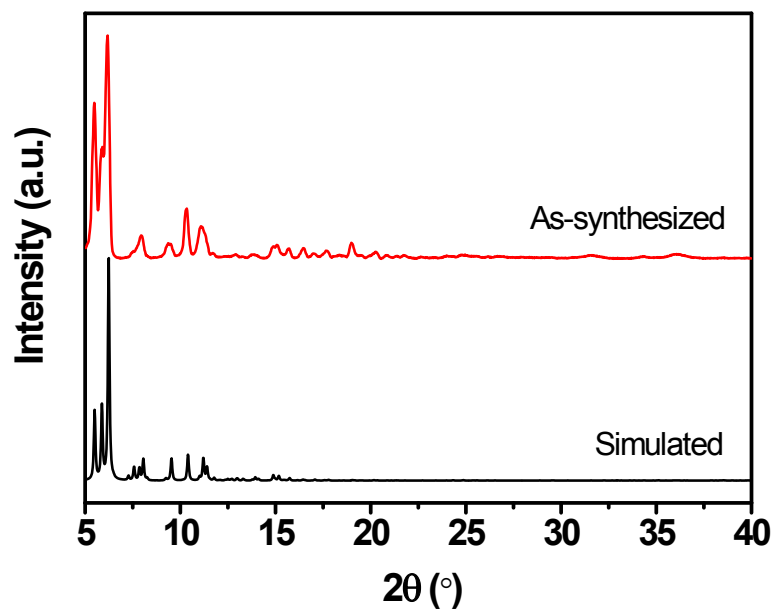

(c)

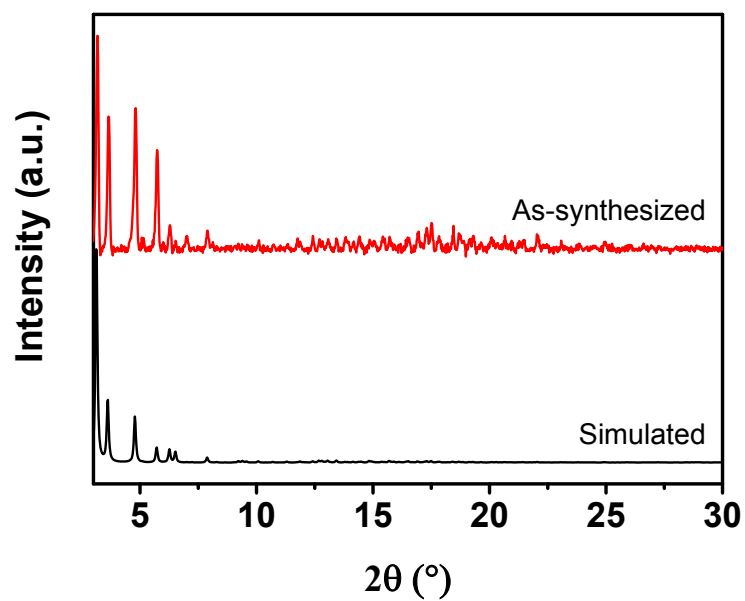

**Figure S2.** PXRD patterns of (a) MOF-5, (b) MOF-177, (c) bioMOF-100.

### S3. Scanning electron microscopy (SEM)

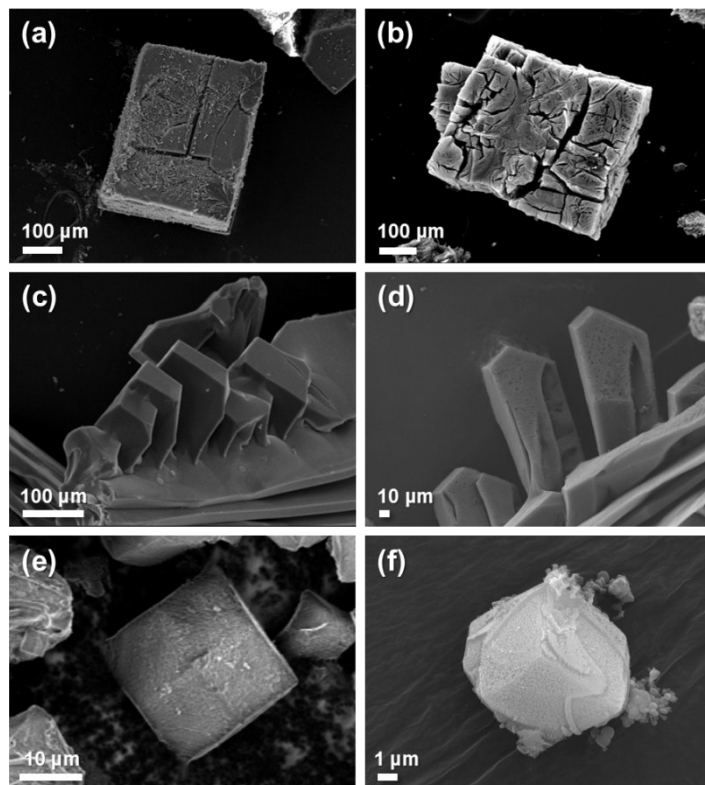

**Figure S3.** SEM images of (a) MOF-5, (b) M5-1000, (c) MOF-177, (d) M177-1000, (e) bioMOF-100 and (f) B100-1000.

(a)

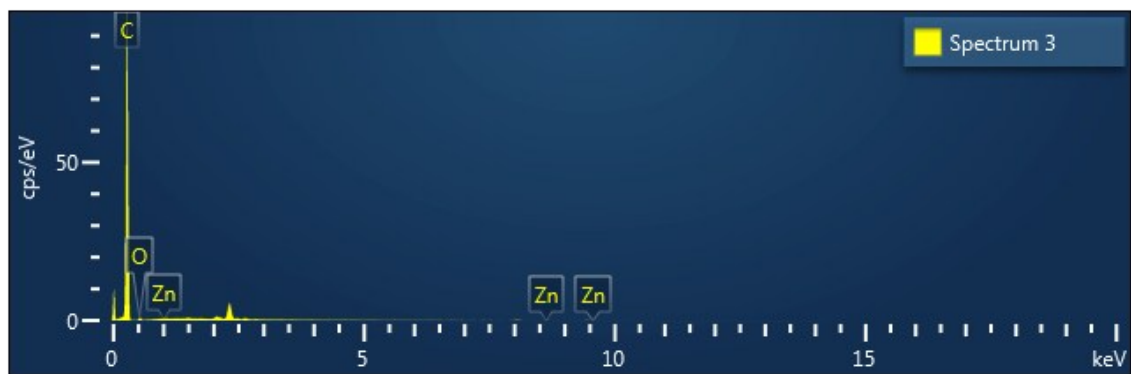

(b)

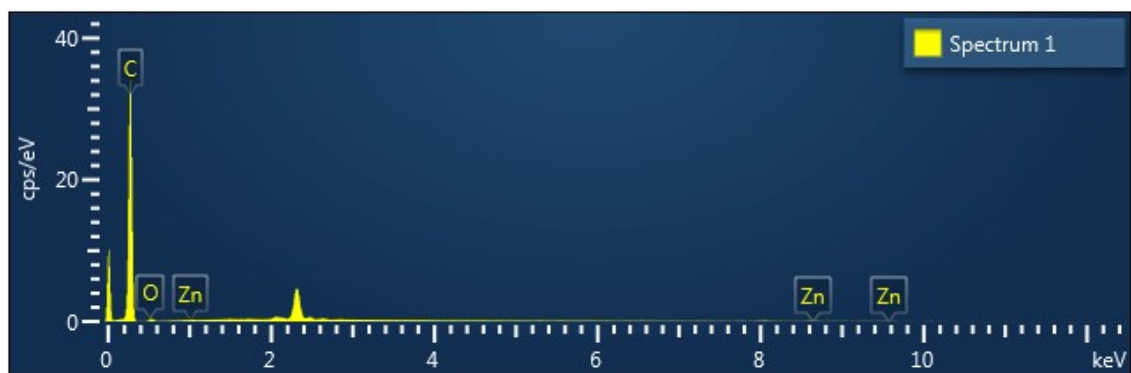

(c)

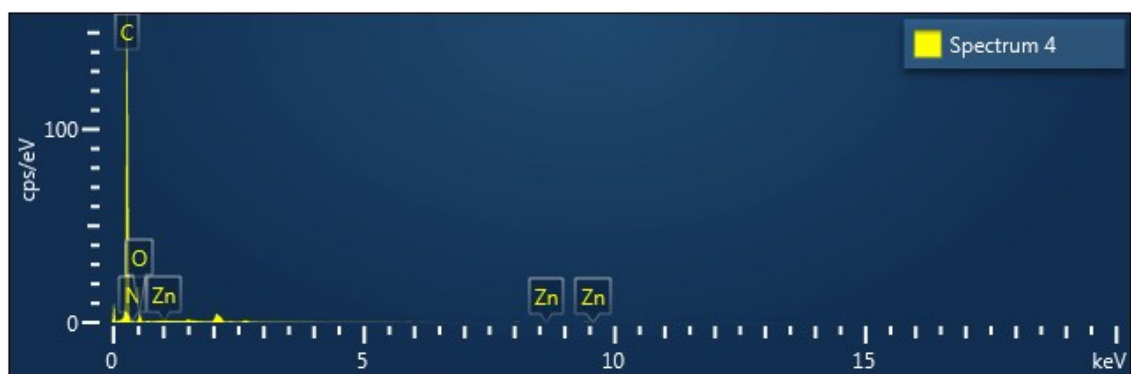

Figure S4. SEM-EDS spectra of (a) M5-1000, (b) M177-1000, (c) B100-1000.



## S4. X-ray photoelectron spectroscopy (XPS) spectra

(a)

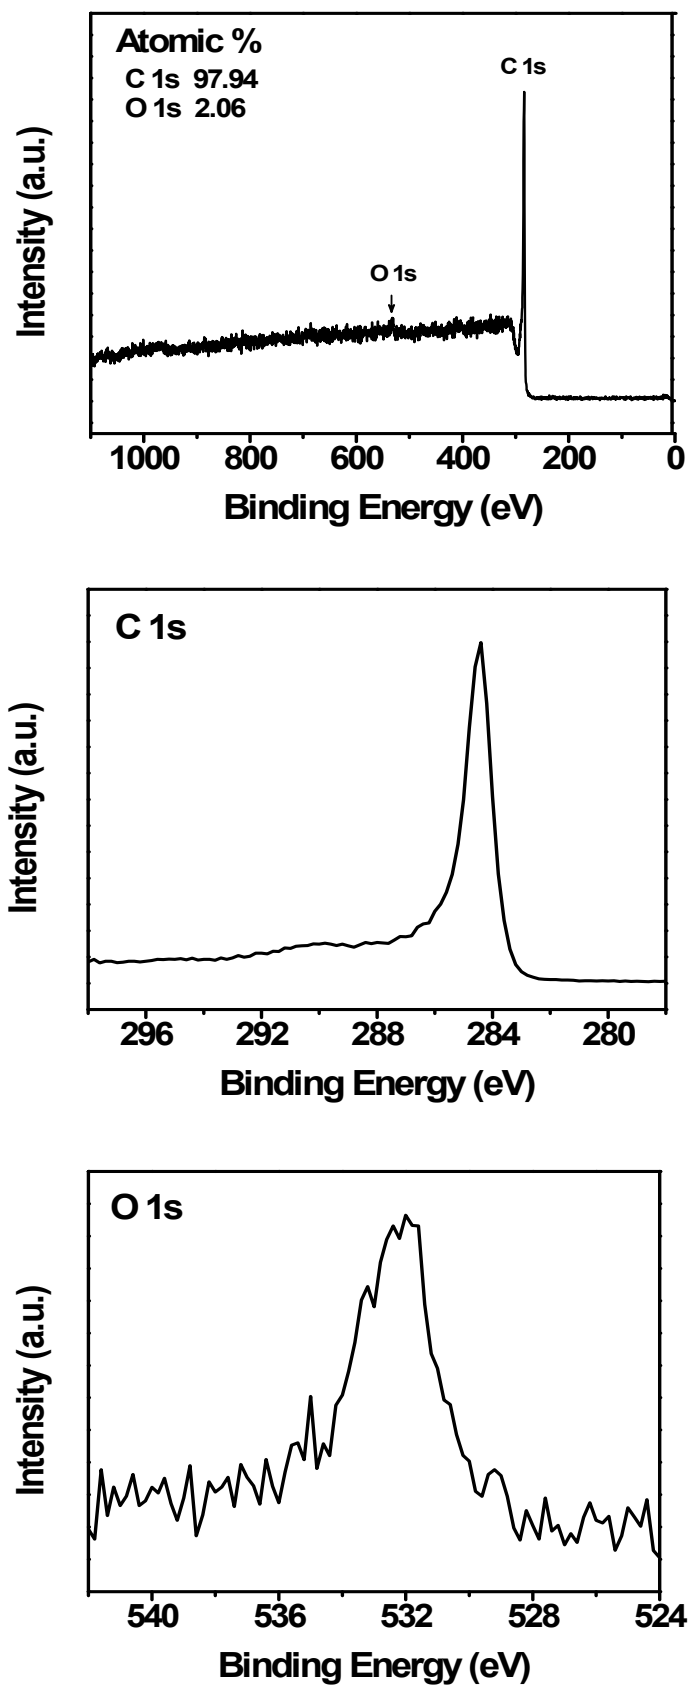

(b)

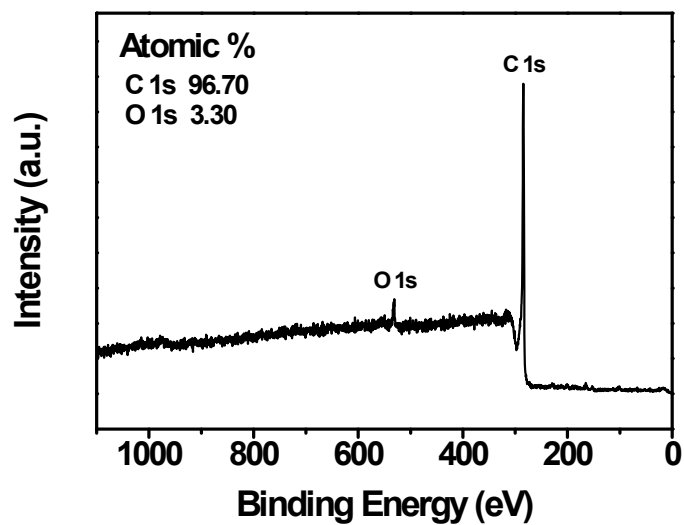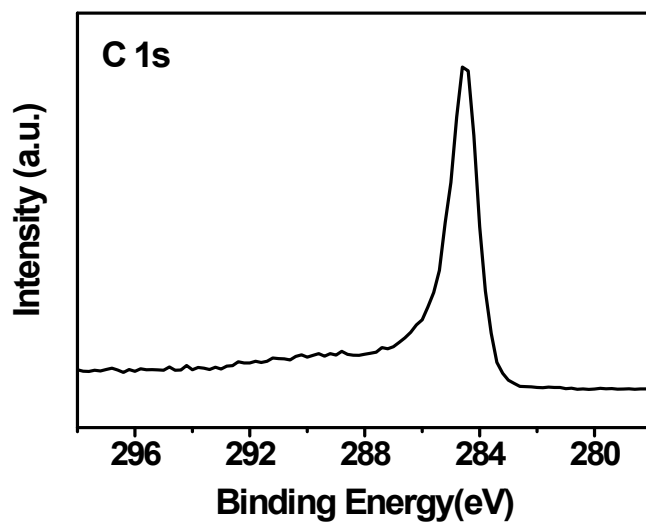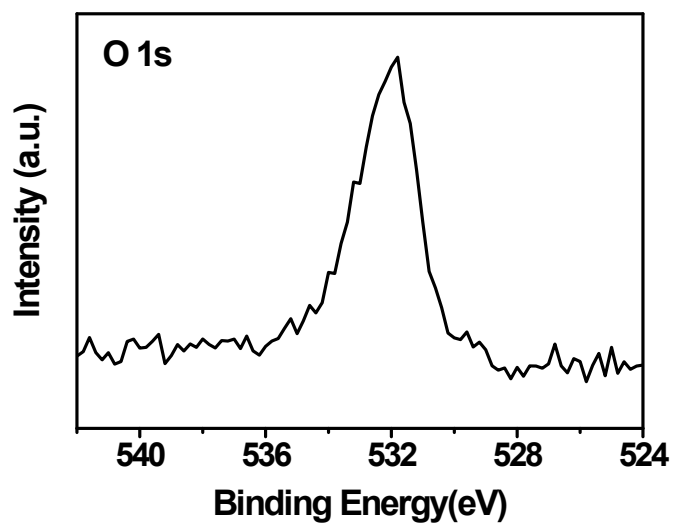

(c)

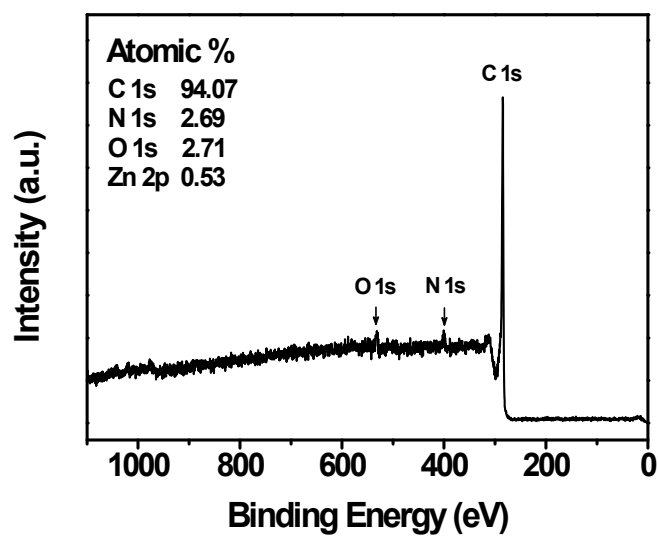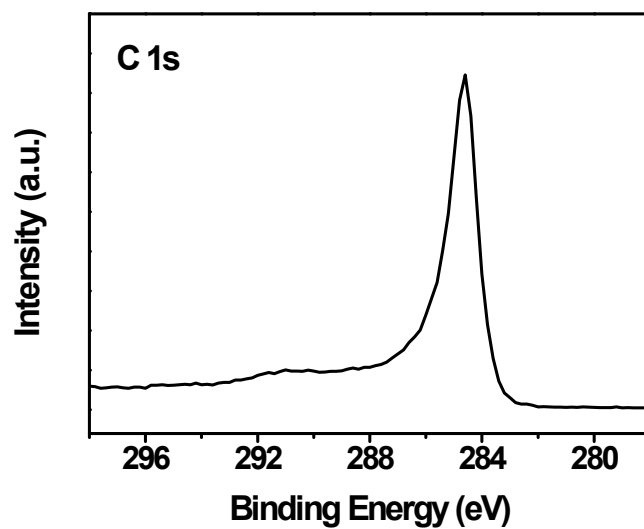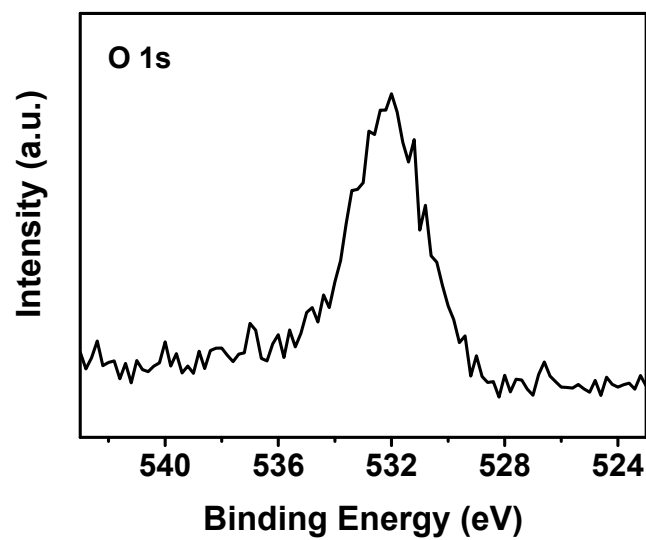

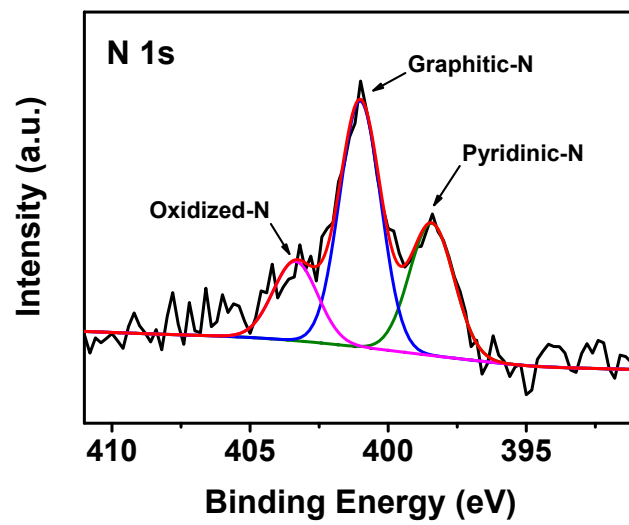

Figure S5. XPS spectra of (a) M5-1000, (b) M177-1000 and (c) B100-1000.

## S5. BET plots

(a)

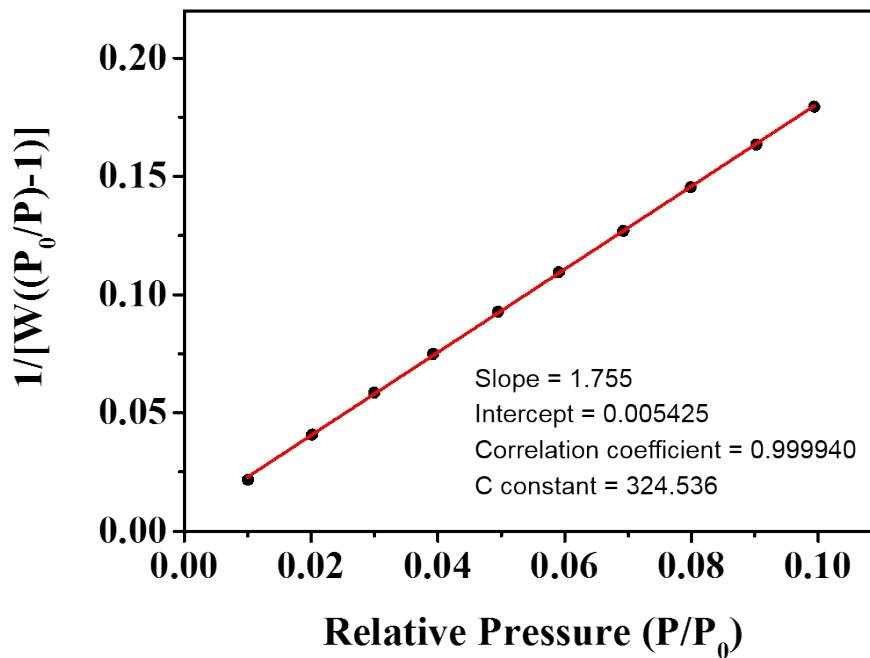

(b)

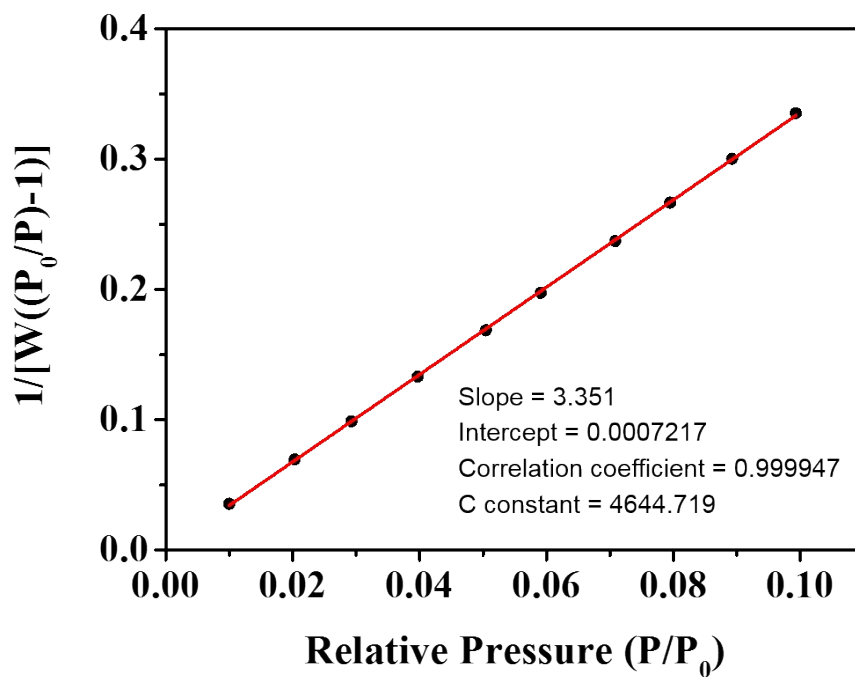

(c)

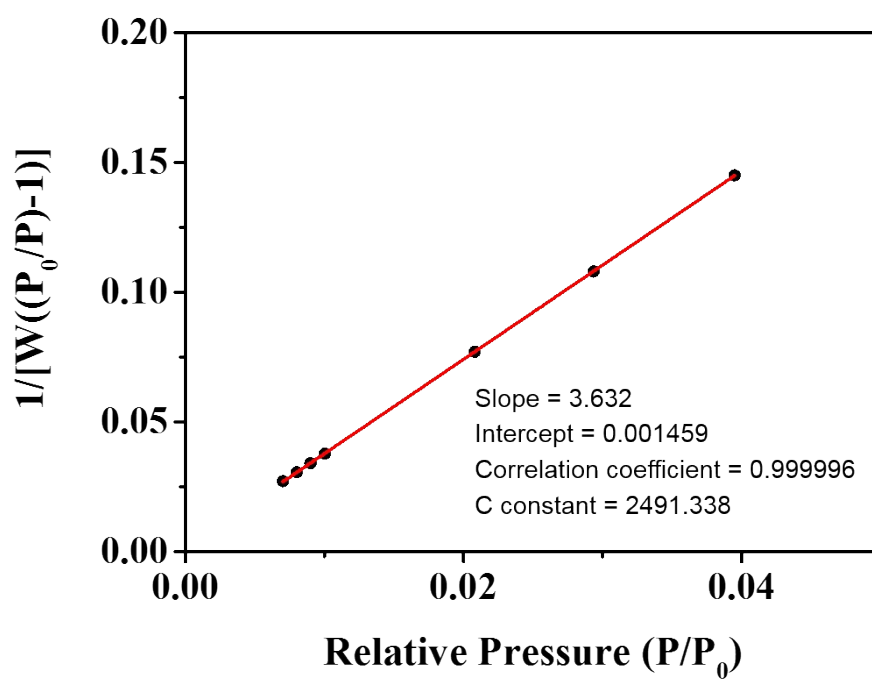

Figure S6. BET plots of (a) M5-1000, (b) M177-1000, (c) B100-1000.

**S6. The relation between surface areas of the porous carbons and Zn contents of the parent MOFs**

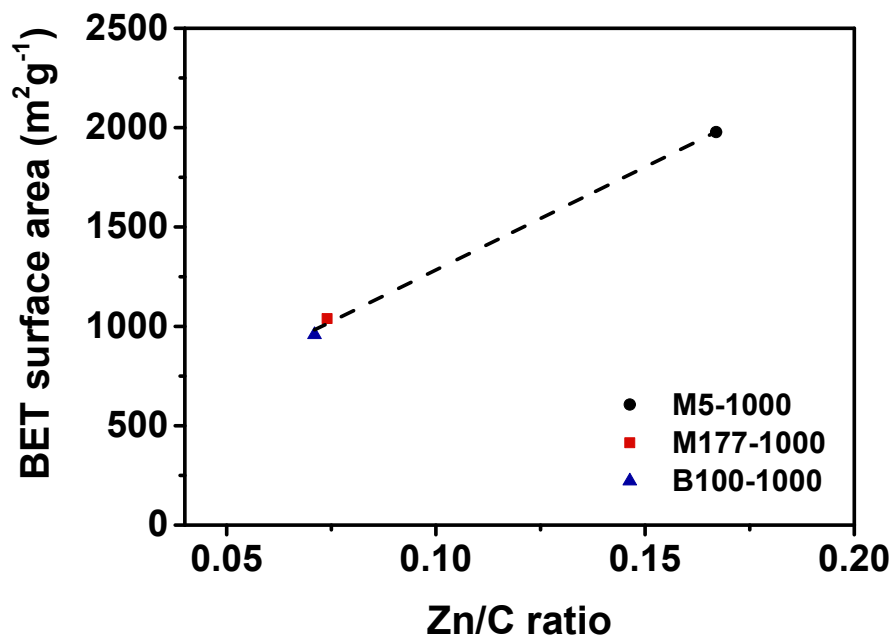

**Figure S7.** The relation between BET surface areas of the porous carbons and Zn/C ratio of the parent MOFs.

**S7. DFT pore size distributions**

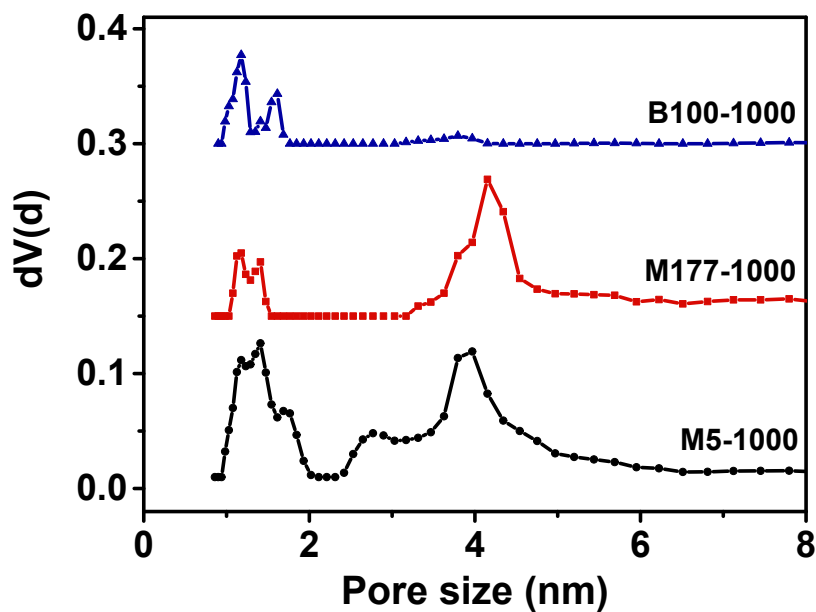

**Figure S8.** DFT pore size distributions of the porous carbons.

## S8. CO<sub>2</sub> adsorption

CO<sub>2</sub> adsorption isotherms at 273 K :

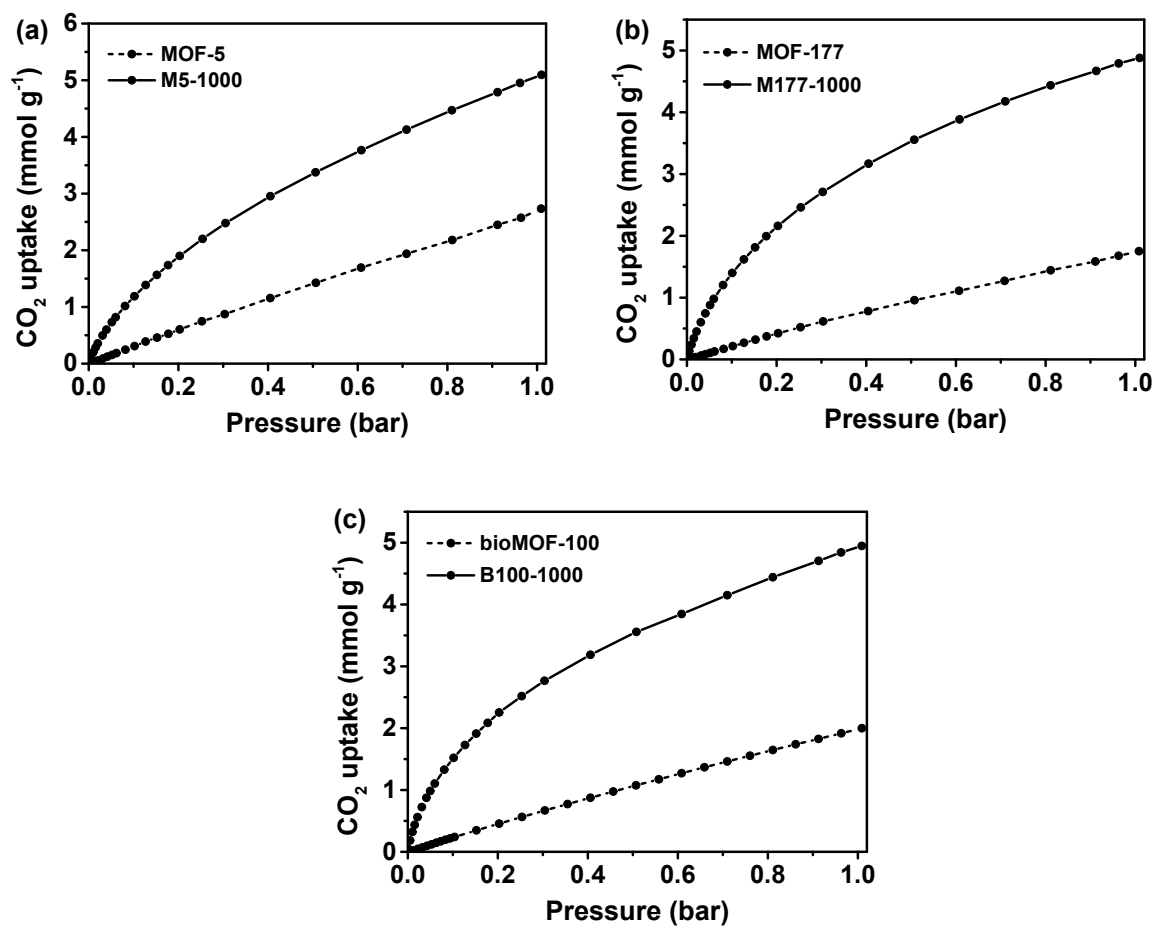

Figure S9. CO<sub>2</sub> adsorption isotherms of pristine MOFs and porous carbons at 273 K.



CO<sub>2</sub> adsorption isotherms at 298 K :

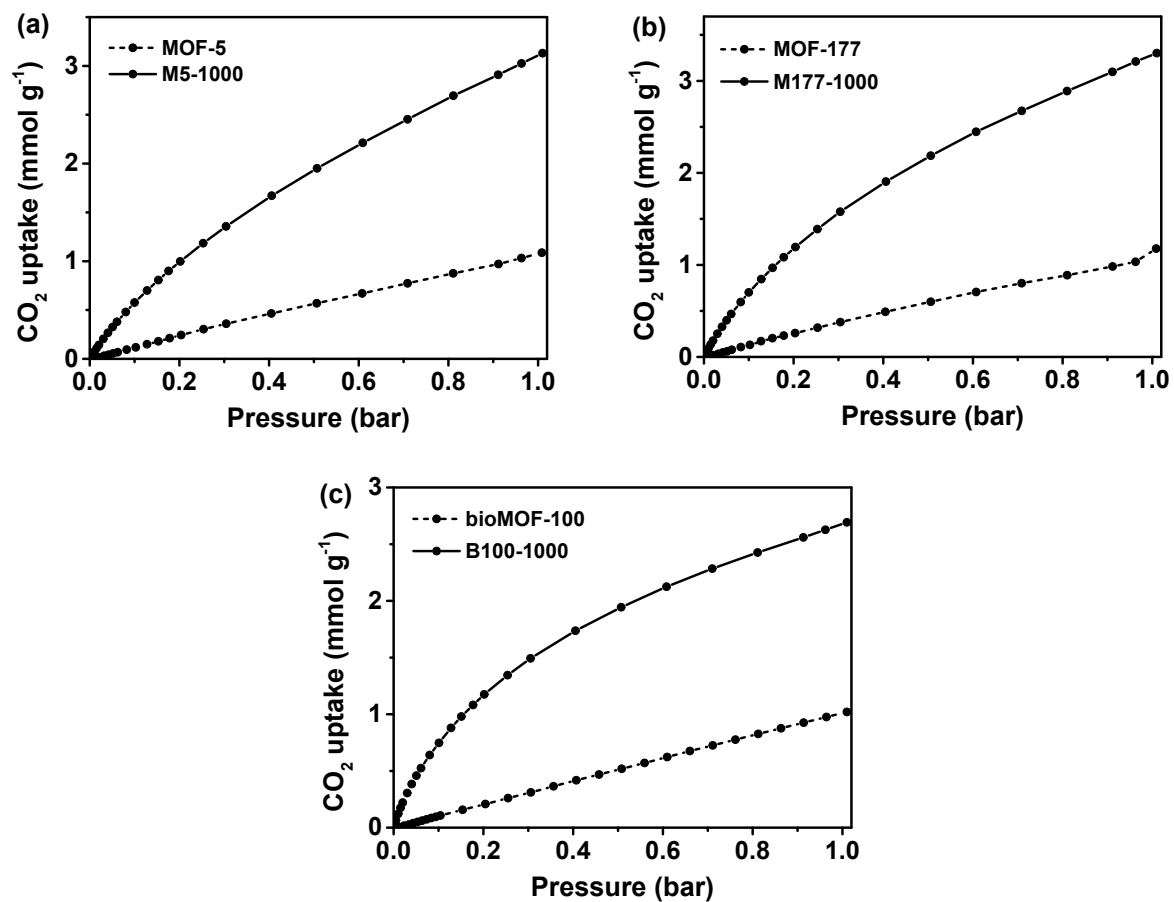

Figure S10. CO<sub>2</sub> adsorption isotherms of pristine MOFs and porous carbons at 298 K.

CO<sub>2</sub> adsorption isotherms at low pressures (273 K) :

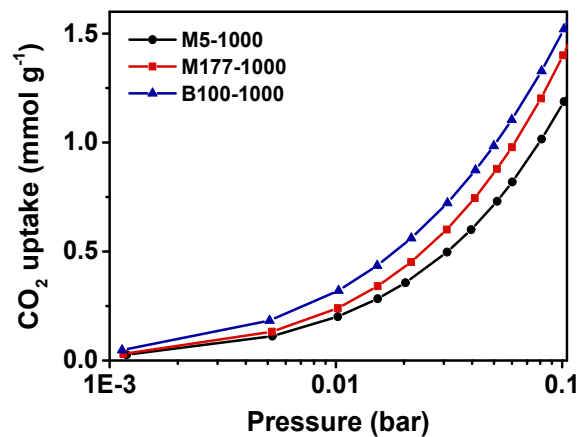

Figure S11. CO<sub>2</sub> adsorption isotherms of the porous carbons at low pressure (273 K).

CO<sub>2</sub> adsorption isotherms at low pressures (298 K) :

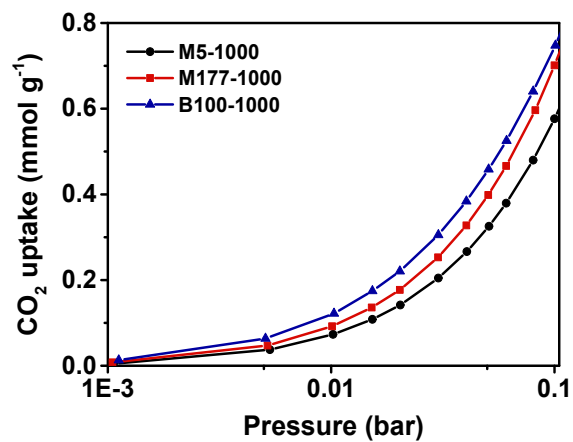

Figure S12. CO<sub>2</sub> adsorption isotherms of the porous carbons at low pressure (298 K).

## S9. IAST selectivity

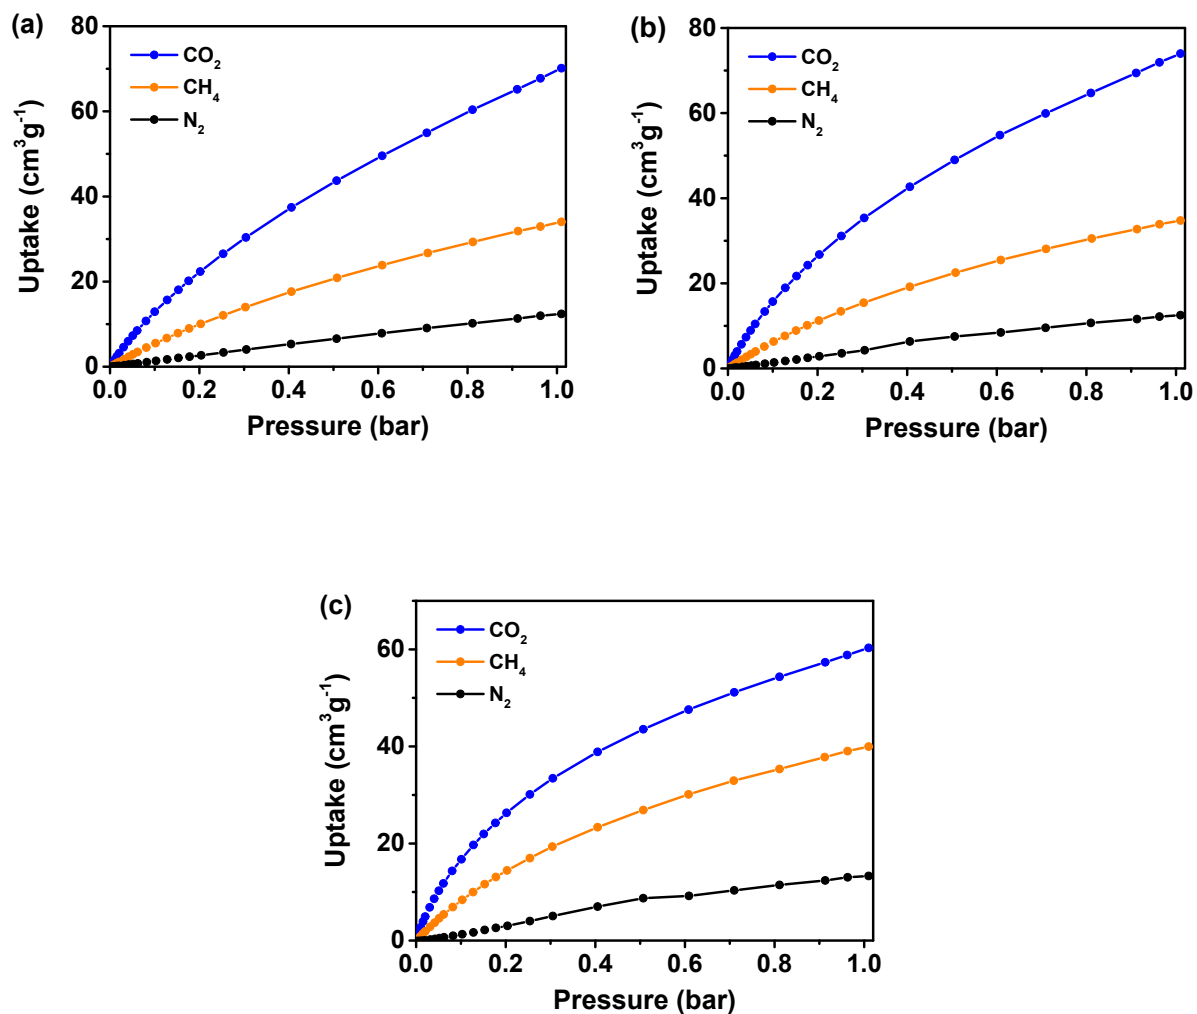

**Figure S13.** Single-component isotherms of CO<sub>2</sub>, CH<sub>4</sub> and N<sub>2</sub> for (a) M5-1000, (b) M177-1000 and (c) B100-1000 at 298 K.

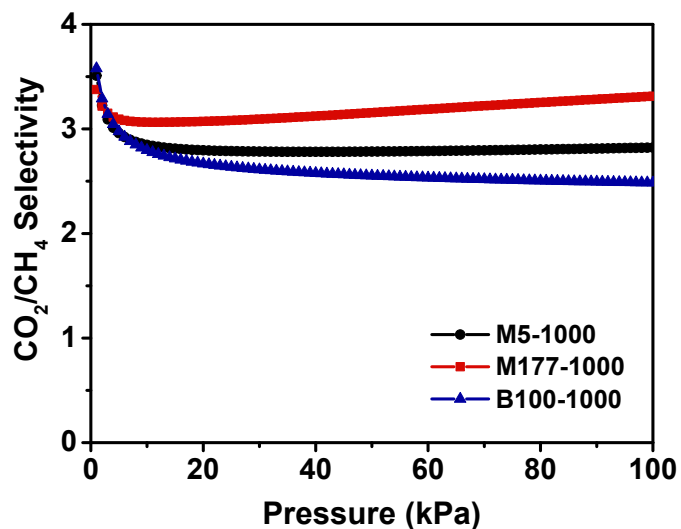

**Figure S14.** CO<sub>2</sub>/CH<sub>4</sub> selectivity of the porous carbons at 298 K.
